# Supplementary material for: Boron-rich enhanced ambient CO2 capture and storage of boron–carbon–nitride hybrid nanotubes
Source: Royal Society of Chemistry journal article supplement (doi:10.1039/d3ta01800h), 2023-01-01
Supplement: d3ta01800h5.pdf [file d3ta01800h5.pdf]

## Supporting Information

### Boron-rich Enhanced Ambient CO<sub>2</sub> Capture and Storage of Boron-Carbon-Nitride Hybrid Nanotubes

Fatemeh Ershadi<sup>1</sup>, Farzaneh Shayeganfar<sup>1,2\*</sup>, Ali Ramazani<sup>3</sup>

<sup>1</sup>Department of Physics and Energy Engineering, Amirkabir University of Technology, Tehran

<sup>2</sup>Department Aerospace Engineering, University of Michigan, Ann Arbor, MI 10485, USA

<sup>3</sup>Department of Mechanical Engineering, Massachusetts Institute of Technology, Cambridge, MA 02139, USA

## Contents

|                                                                                                        |   |
|--------------------------------------------------------------------------------------------------------|---|
| 1. The geometric configurations of three-row BC <sub>2</sub> NNT                                       | 2 |
| 2. Comparison of E <sub>ads</sub> in three-row and single-row unit cells in BC <sub>2</sub> NNT        | 3 |
| 3. PDOS of BC <sub>4</sub> NNT (8,0)                                                                   | 4 |
| 4. PDOS of p-BNCNT (8,0)                                                                               | 5 |
| 5. The geometric configurations of single-row BC <sub>4</sub> NNT (14,0)                               | 6 |
| 6. The geometric configurations of single-row BC <sub>2</sub> NNT (14,0)                               | 7 |
| 7. Comparing the recovery time of CO <sub>2</sub> adsorption in different sites of BC <sub>2</sub> NNT | 8 |
| 8. Mesh cut-off optimization plots                                                                     | 9 |

---

\* fshayeganfar@aut.ac.ir  
fshayega@umich.edu

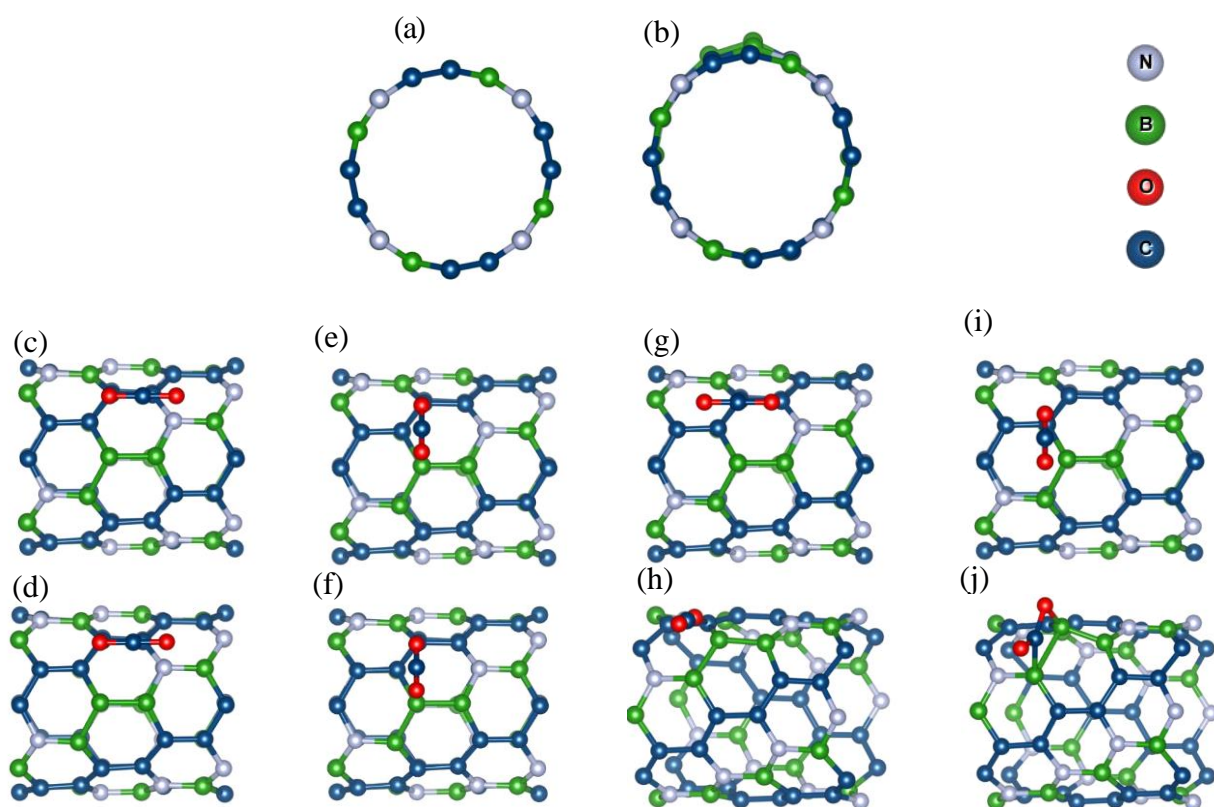

**Figure S1.** (a) The geometric configurations are three-row BC<sub>2</sub>NNT (8,0) without CO<sub>2</sub> before relaxation and (b) after relaxation. (c) Adsorption of CO<sub>2</sub> on the B<sub>N</sub> site, where the O atom is located above the B<sub>N</sub> site and parallel to the nanotube axis before and (d) after relaxation, (e) the O atom is located above the B<sub>N</sub> site and oblique to the nanotube axis before and (f) after relaxation, (g) C of CO<sub>2</sub> is top of B<sub>N</sub> parallel to the nanotube axis before and (h) after relaxation, (i) C of CO<sub>2</sub> is top of B oblique to the nanotube axis before and (j) after relaxation.

**Table S1.** Comparison of adsorption energy in nanotubes with three-row and single-row unit cells in BC<sub>2</sub>NNT

|                               | Single-row BC <sub>2</sub> NNT unit cell E <sub>ads</sub> | Three rows BC <sub>2</sub> NNT unit cell E <sub>ads</sub> |
|-------------------------------|-----------------------------------------------------------|-----------------------------------------------------------|
| O up B <sub>N</sub> -Parallel | -0.63 eV                                                  | -0.35 eV                                                  |
| O up B <sub>N</sub> -Oblique  | -0.42 eV                                                  | -0.21 eV                                                  |
| C up B <sub>N</sub> -Parallel | -0.63 eV                                                  | -0.34 eV                                                  |
| C up B <sub>N</sub> -Oblique  | -2.52 eV                                                  | -1.12 eV                                                  |

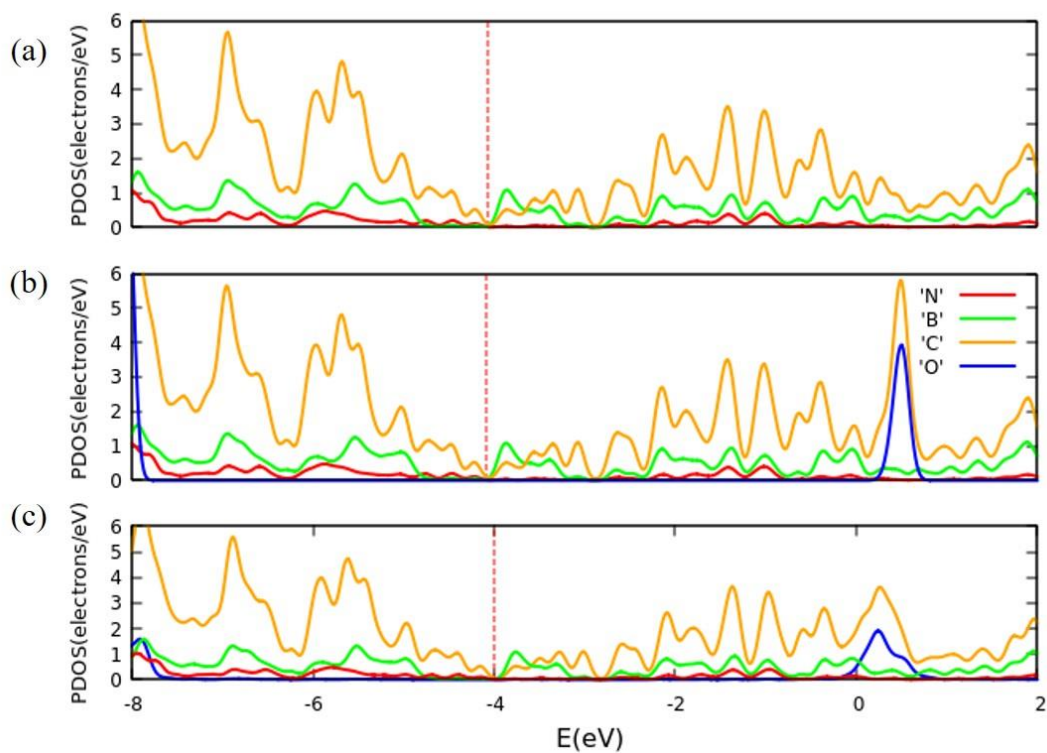

**Figure S2.** PDOS of BC<sub>4</sub>NNT (8,0) for (a) isolated nanotube, (b) where CO<sub>2</sub> is at 4.6 Å far from the nanotube. (c), for the physisorption process where the C atom is located above the B<sub>N</sub>-parallel site. The red dashed lines show the Fermi level.

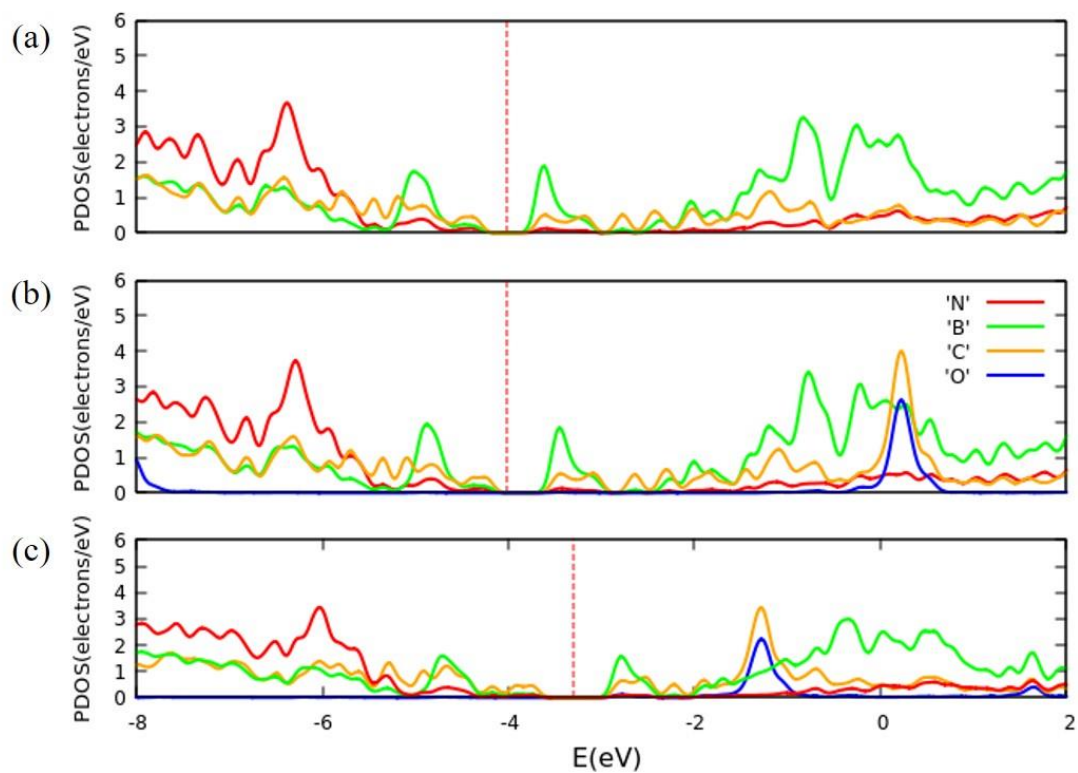

**Figure S3.** PDOS of p-BNCNT (8,0) nanotube for (a) isolated nanotube, (b) where CO<sub>2</sub> is at 5 Å far from the nanotube. (c), for the physisorption process where the C atom is located above the B<sub>N</sub>-oblique site. The red dashed lines show the Fermi level.

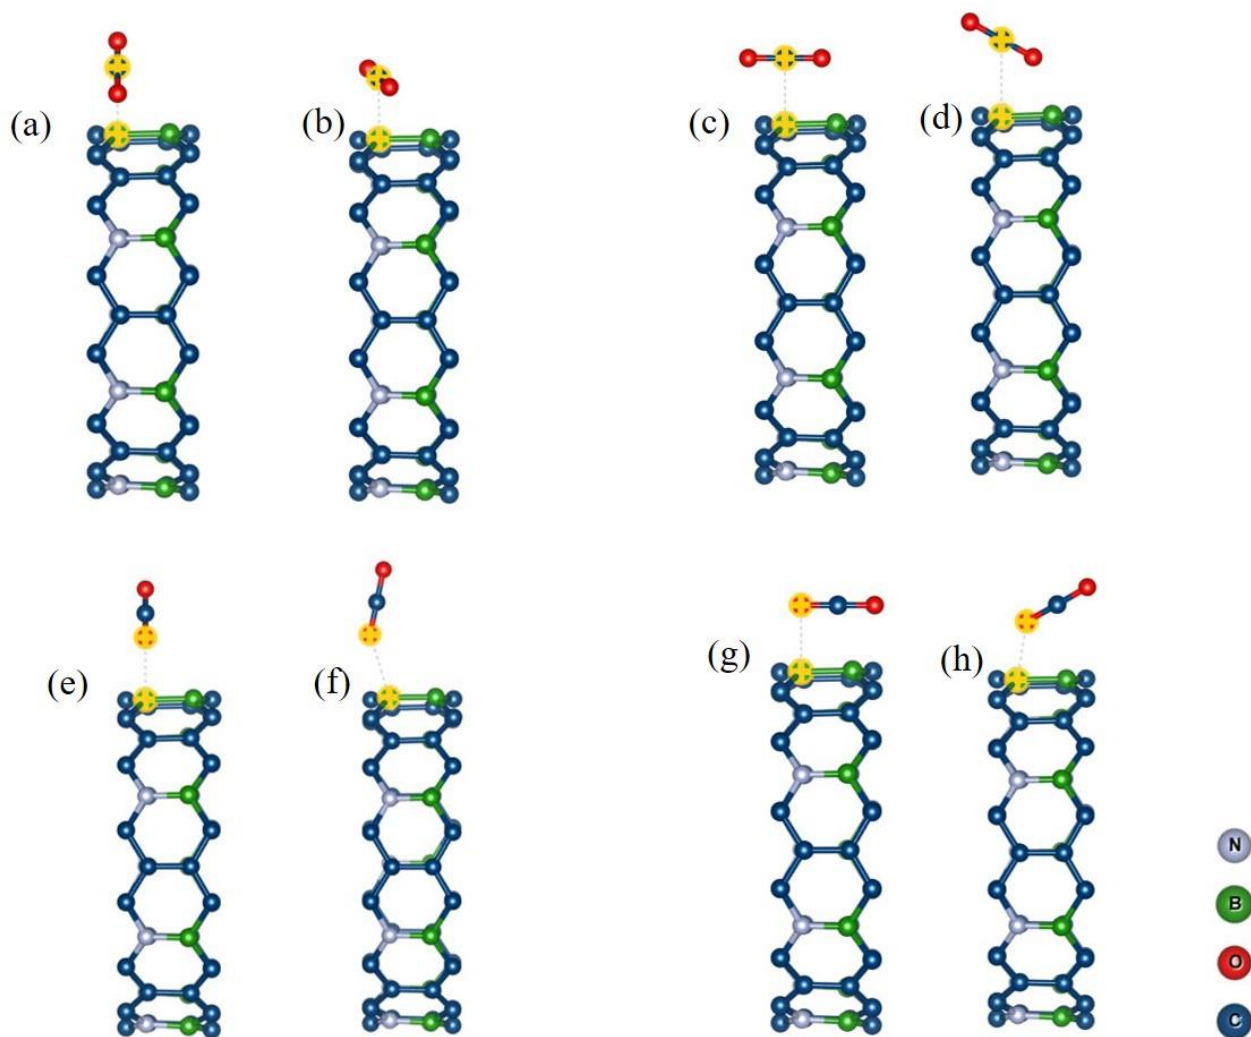

**Figure S4.** The geometric configurations of single-row BC<sub>4</sub>NNT (14,0). (a) The adsorption of CO<sub>2</sub> where the C atom is located above B<sub>N</sub> site and oblique to the nanotube axis before and (b) after relaxation, the C atom is located above B<sub>N</sub> site and parallel to the nanotube axis (c) before and (d) after relaxation, O atom is located above B<sub>N</sub> site and oblique to the nanotube axis (e) before and (f) after relaxation, the O atom is located above B<sub>N</sub> site and parallel to the nanotube axis (g) before and (h) after relaxation.

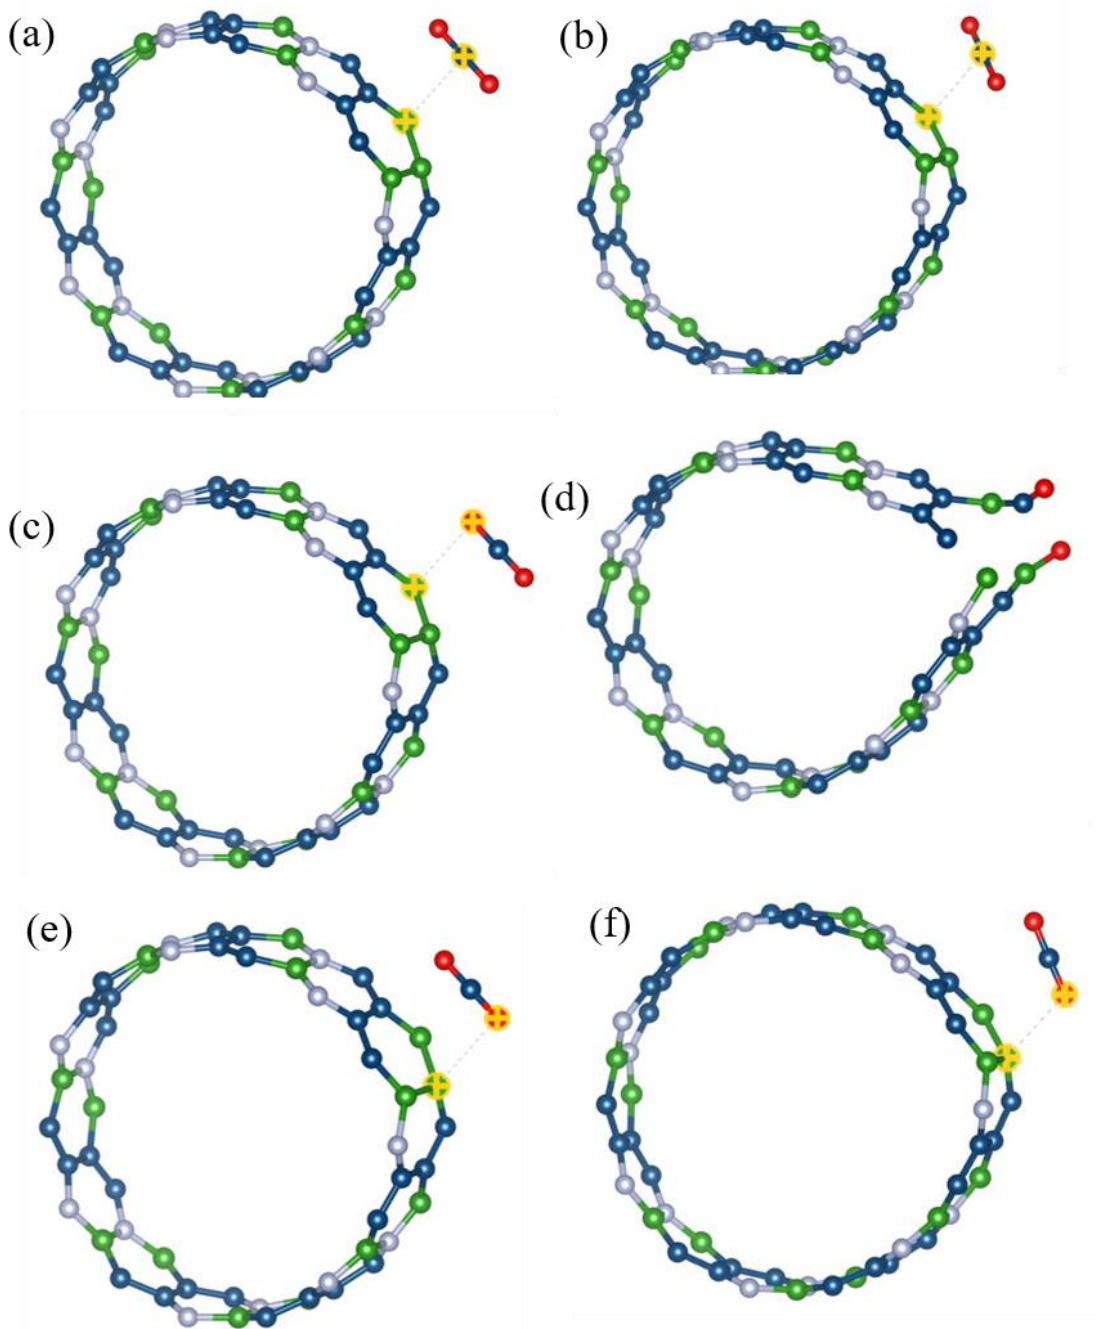

**Figure S5.** The geometric configurations of single-row  $\text{BC}_2\text{NNT}$  (14,0). (a) The adsorption of  $\text{CO}_2$  where the C atom is located above  $\text{B}_\text{N}$  site and oblique to the nanotube axis before and (b) after relaxation, the O atom is located above  $\text{B}_\text{N}$  site and oblique to the nanotube axis (c) before and (d) after relaxation, O atom is located above B site and oblique to the nanotube axis (e) before and (f) after relaxation.

**Table S2.** Comparing the recovery time of CO<sub>2</sub> adsorption in different sites of BC<sub>2</sub>NNT.

| Recovery time           | Adsorption energy | Structure                                               |
|-------------------------|-------------------|---------------------------------------------------------|
| 0.0488 s                | -0.635 eV         | C up B <sub>N</sub> -parallel (BC <sub>2</sub> NNT)-8-0 |
| $3.44 \times 10^{30}$ s | -2.527 eV         | C up B-oblique (BC <sub>2</sub> NNT)-8-0                |
| 0.04770 s               | -0.634 eV         | O up B <sub>N</sub> -parallel (BC <sub>2</sub> NNT)-8-0 |
| $1.26 \times 10^{-4}$ s | -0.422 eV         | O up B <sub>N</sub> -oblique (BC <sub>2</sub> NNT)-8-0  |

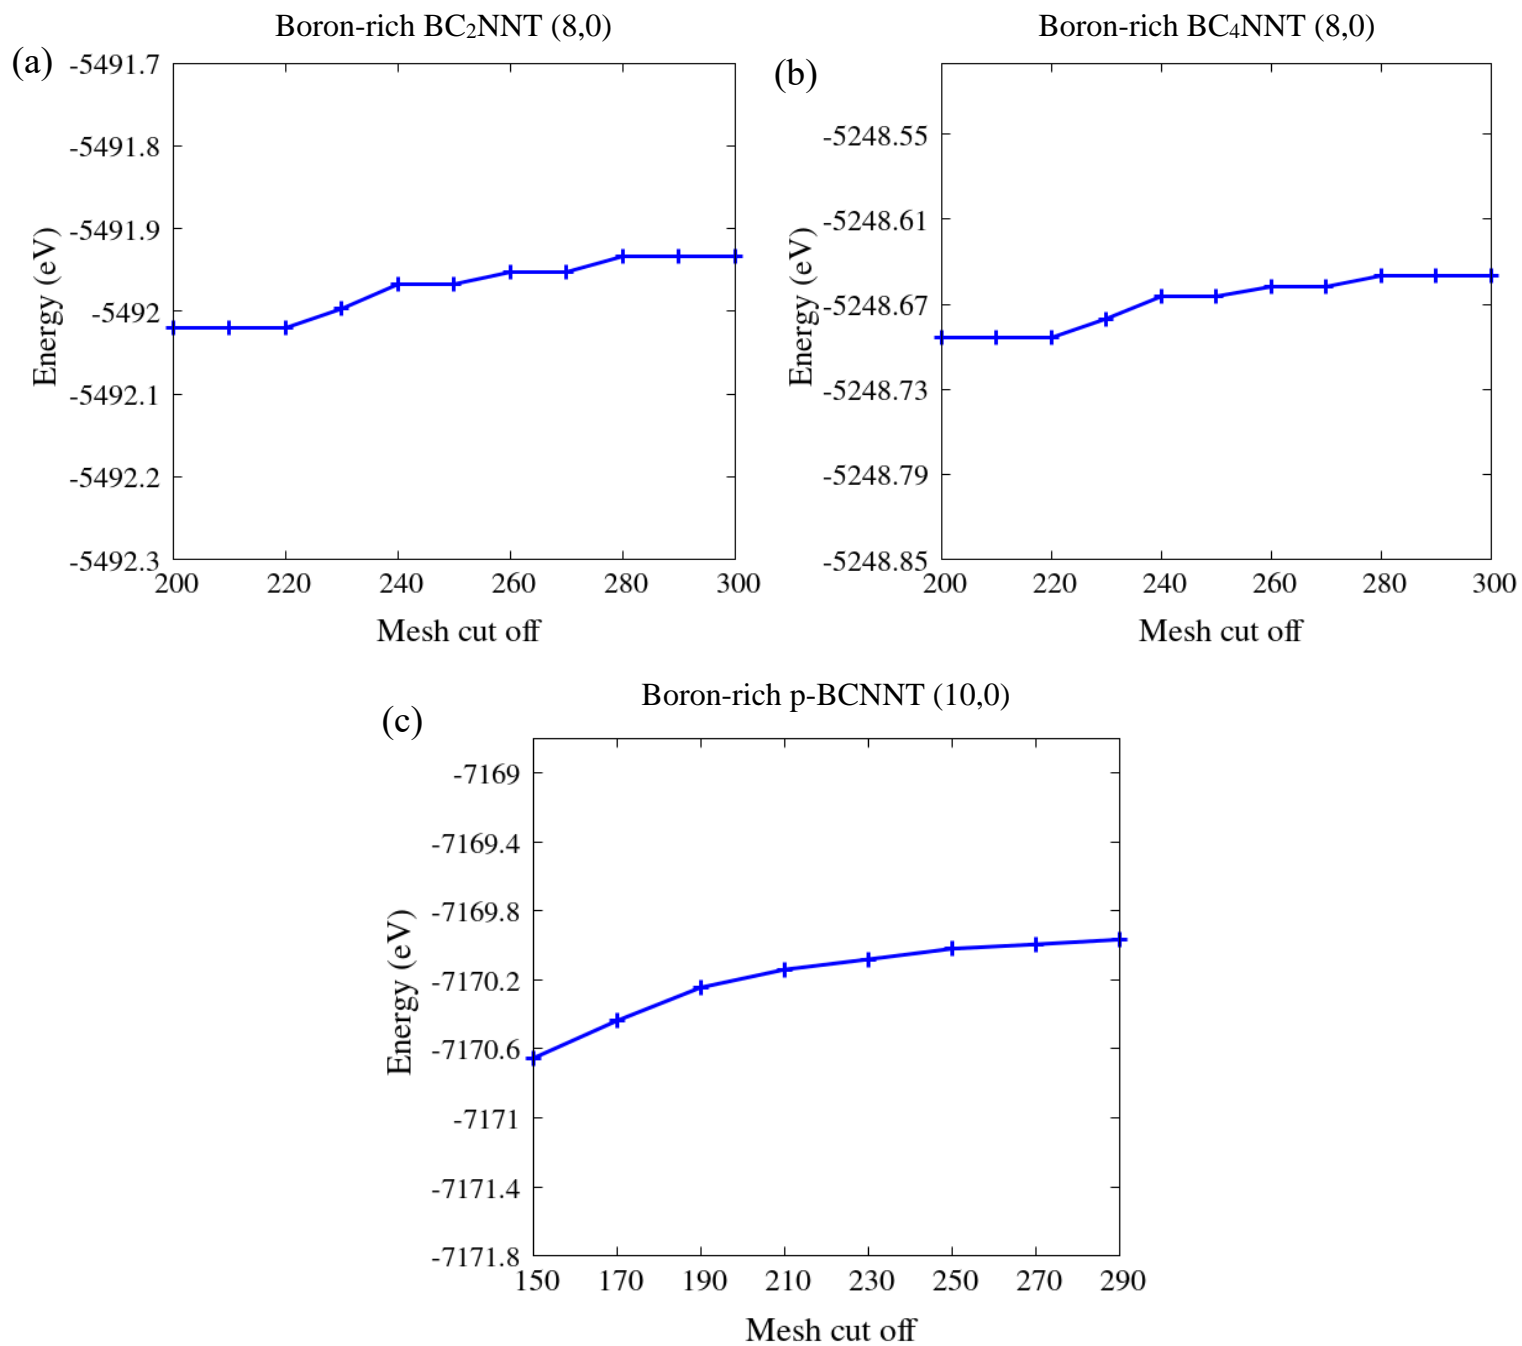

**Figure S6.** Mesh cut-off optimization plot of (a) BC<sub>2</sub>NNT (8,0), (b) BC<sub>4</sub>NNT (8,0), and (c) BCNNT (10,0)
